# Supplementary material for: Effectiveness of Bundled Hyperpolypharmacy Deprescribing Compared With Usual Care Among Older Adults: A Randomized Clinical Trial
Source: PubMed Central journal article supplement — JAMA Netw Open. 2023 Jul 10;6(7):e2322505. doi: 10.1001/jamanetworkopen.2023.22505 (PMC10334220; doi:10.1001/jamanetworkopen.2023.22505), 2023-07-10
Supplement: jamanetwopen-e2322505-s002.pdf [file jamanetwopen-e2322505-s002.pdf]

## Supplementary Online Content

Herrinton LJ, Lo K, Alavi M, et al. Effectiveness of bundled hyperpolypharmacy deprescribing compared with usual care among older adults: a randomized clinical trial. *JAMA Netw Open*. 2023;6(7):e2322505. doi:10.1001/jamanetworkopen.2023.22505

**eTable 1.** Deprescribing Process Variables Among Those Who Agreed to the Intervention (n = 1062)

**eTable 2.** Medication Classes Discussed Among 739 Patients and Deprescribing Actions

**eTable 3.** Association of Bundled Hyperpolypharmacy Deprescribing Intervention vs Usual Care With Components of Geriatric Syndrome

**eTable 4.** Risk of Death During Follow-up, Usual Care Compared With Intervention Groups

This supplementary material has been provided by the authors to give readers additional information about their work.

**eTable 1.** Deprescribing Process Variables Among Those Who Agreed to the Intervention (n = 1062)

| <b>Per Person</b>                                   |                       | <b>N</b>         | <b>%</b> |
|-----------------------------------------------------|-----------------------|------------------|----------|
| Average days from allocation to the first encounter |                       | 23 (range 1-119) |          |
| Spoke with                                          |                       |                  |          |
|                                                     | Patient               | 889              | 84       |
|                                                     | Authorized individual | 42               | 4        |
|                                                     | Caregiver             | 131              | 12       |
| Number of cycles administered                       |                       |                  |          |
|                                                     | 1                     | 663              | 62       |
|                                                     | 2                     | 176              | 17       |
|                                                     | 3                     | 115              | 11       |
|                                                     | 4                     | 50               | 5        |
|                                                     | ≥5                    | 58               | 5        |
| No. of medications discussed <sup>a</sup>           |                       |                  |          |
|                                                     | 0                     | 323              | 30       |
|                                                     | 1                     | 397              | 37       |
|                                                     | 2                     | 227              | 21       |
|                                                     | 3                     | 88               | 8        |
|                                                     | ≥4                    | 27               | 3        |
| No. of medication classes deprescribed              |                       |                  |          |
|                                                     | 0                     | 322              | 30       |
|                                                     | 1                     | 413              | 39       |
|                                                     | 2                     | 226              | 21       |
|                                                     | 3                     | 79               | 7        |
|                                                     | ≥4                    | 21               | 2        |

<sup>a</sup>Each medication was counted only once per person even if it was discussed over multiple cycles.

**eTable 2.** Medication Classes Discussed Among 739 Patients and Deprescribing Actions

| Per medication class                          | Number and % of medications |    |
|-----------------------------------------------|-----------------------------|----|
|                                               | N                           | %  |
| <b>Medication class discussed<sup>a</sup></b> |                             |    |
| Antiemetics                                   | 9                           | 1  |
| Antihistamines                                | 52                          | 4  |
| Antipsychotics                                | 3                           | 0  |
| Antitussives                                  | 20                          | 2  |
| Aspirin/clopidogrel                           | 49                          | 4  |
| Asthma/COPD                                   | 60                          | 5  |
| Bisphosphonates                               | 30                          | 3  |
| Digoxin                                       | 10                          | 1  |
| Dm                                            | 95                          | 8  |
| Ezetimibe                                     | 1                           | 0  |
| Fibrates                                      | 5                           | 0  |
| Gabapentin                                    | 92                          | 8  |
| Gout                                          | 12                          | 1  |
| H2R-agonist                                   | 103                         | 9  |
| Hypertension                                  | 47                          | 4  |
| Levothyroxine                                 | 90                          | 8  |
| Nitrates                                      | 27                          | 2  |
| NSAIDs                                        | 64                          | 5  |
| Potassium                                     | 28                          | 2  |
| PPIs                                          | 133                         | 11 |
| Skeletal muscle relaxants                     | 22                          | 2  |
| Statins                                       | 39                          | 3  |
| TCAs                                          | 25                          | 2  |
| Diabetes test strips                          | 1                           | 0  |
| Urinary antispasmodics                        | 41                          | 3  |
| Vitamin D                                     | 47                          | 4  |
| Others                                        | 87                          | 7  |
| <b>Recommended deprescribing action</b>       |                             |    |
| Change medication                             | 101                         | 8  |
| Discontinue medication                        | 283                         | 23 |
| Increase dose                                 | 8                           | 1  |
| Initiate medication                           | 2                           | 0  |
| No action taken at this time                  | 321                         | 26 |
| Reduce dose of medication                     | 433                         | 35 |
| Reduce dose to PRN                            | 37                          | 3  |
| Restart medication                            | 1                           | 0  |
| Not recorded                                  | 46                          | 4  |
| <b>Patient response to recommendation</b>     |                             |    |
| Accepted                                      | 752                         | 61 |
| Declined                                      | 195                         | 16 |
| Decision deferred                             | 210                         | 17 |
| Not recorded                                  | 75                          | 6  |

| Per medication class                                    | Number and % of medications |    |
|---------------------------------------------------------|-----------------------------|----|
|                                                         | N                           | %  |
| <b>Other actions by Pharmacist, if not deprescribed</b> |                             |    |
| Reconcile medications                                   | 97                          | 19 |
| Education patient                                       | 210                         | 42 |
| Send recommendation to primary care provider            | 152                         | 30 |
| Send recommendation to specialist/department            | 22                          | 4  |
| Refer to advice nurse or appointment line               | 3                           | 1  |
| Other action                                            | 19                          | 4  |

<sup>a</sup>The number of medications discussed was larger than the number recommended for deprescribing because some patients used multiple medications in the same class. Patients were counted multiple times if they were deprescribed multiple medications.

**eTable 3.** Association of Bundled Hyperpolypharmacy Deprescribing Intervention vs Usual Care With Components of Geriatric Syndrome

| Group                                        | Cognitive % (95% CI) | Urinary % (95% CI)  | Falls % (95% CI)    | Pain % (95 %CI)     |
|----------------------------------------------|----------------------|---------------------|---------------------|---------------------|
| Usual care (N=1233)                          |                      |                     |                     |                     |
| Baseline                                     | 23.7 (21.3 to 26.1)  | 12.2 (10.3 to 14.0) | 17.7 (15.6 to 19.8) | 18.5 (16.3 to 20.7) |
| Post                                         | 25.7 (23.3 to 28.2)  | 12.2 (10.3 to 14)   | 17.8 (15.6 to 19.9) | 19.2 (17 to 21.4)   |
| Difference                                   | 2.0 (-0.7 to 4.8)    | 0.0                 | 0.1 (-2.4 to 2.6)   | 0.7 (-1.8 to 3.3)   |
| Intervention, intention to treat (N=1237)    |                      |                     |                     |                     |
| Baseline                                     | 20.2 (18.0 to 22.5)  | 10.1 (8.4 to 11.8)  | 16.2 (14.2 to 18.3) | 19.9 (17.7 to 22.1) |
| Post                                         | 22.6 (20.3 to 25.0)  | 9.9 (8.2 to 11.5)   | 17.9 (15.8 to 20.1) | 20.7 (18.4 to 22.9) |
| Difference                                   | 2.4 (-0.2 to 5.0)    | -0.2 (-2.0 to 1.6)  | 1.7 (-0.1 to 4.2)   | 0.8 (-1.8 to 3.4)   |
| DID <sup>a</sup>                             | 0.4 (-3.5 to 4.3)    | -0.2 (-2.9 to 2.4)  | 1.6 (-1.9 to 5.2)   | 0.1 (-3.6 to 3.8)   |
| P value                                      | 0.84                 | 0.86                | 0.37                | 0.97                |
| Intervention, as-treated (N=1062)            |                      |                     |                     |                     |
| Baseline                                     | 18.6 (16.2 to 20.9)  | 9.6 (7.8 to 11.4)   | 15.5 (13.4 to 17.7) | 19.9 (17.5 to 22.3) |
| Post                                         | 22.4 (19.9 to 24.9)  | 9.7 (7.9 to 11.5)   | 17 (14.8 to 19.3)   | 20.8 (18.4 to 23.3) |
| Difference                                   | 3.9 (0.9 to 6.7)     | 0.1 (-1.8 to 2.1)   | 1.5 (-1.3 to 4.3)   | 0.9 (-1.9 to 3.8)   |
| DID                                          | 1.8 (-2.2 to 5.9)    | 0.1 (-2.7 to 2.9)   | 1.4 (-2.3 to 5.1)   | 0.2 (-3.7 to 4.1)   |
| P value                                      | 0.37                 | 0.95                | 0.45                | 0.92                |
| Intervention, accepted deprescribing (N=438) |                      |                     |                     |                     |
| Baseline                                     | 16.7 (13.2 to 20.2)  | 8.7 (6.0 to 11.3)   | 15.6 (12.3 to 19.2) | 19.4 (15.7 to 23.1) |
| Post                                         | 20.1 (16.3 to 23.8)  | 8.7 (6.0 to 11.3)   | 14.8 (11.5 to 18.2) | 20.3 (16.6 to 24.1) |
| Difference                                   | 3.4 (-0.9 to 7.8)    | 0.0 (-2.9 to 2.9)   | -0.9 (-5.3 to 3.4)  | 0.9 (3.6 to 5.4)    |
| DID                                          | 1.4 (-3.8 to 6.6)    | 0.0 (-3.6 to 3.6)   | -1.0 (-6.0 to 4.0)  | 1.8 (-5.0 to 5.4)   |
| P value                                      | 0.60                 | 1.00                | 0.70                | 0.95                |

<sup>a</sup>DID = difference in difference comparing intervention to usual care.

**eTable 4.** Risk of Death During Follow-up, Usual Care Compared With Intervention Groups

| Group                                     | Statistic                                |
|-------------------------------------------|------------------------------------------|
| Usual care (N=1233)                       | N=124 (10.1%, with 95% CI 8.4% to 11.9%) |
| Intervention, intention to treat (N=1237) | N=131 (10.6% with 95% CI 8.9% to 12.4%)  |
| Risk difference (95% CI)                  | 0.5% (95% CI -1.9 to 2.9%)               |
| P value                                   | 0.67                                     |
