# Supplementary material for: Effectiveness of Bundled Hyperpolypharmacy Deprescribing Compared With Usual Care Among Older Adults: A Randomized Clinical Trial
Source: PubMed Central journal article supplement — JAMA Netw Open. 2023 Jul 10;6(7):e2322505. doi: 10.1001/jamanetworkopen.2023.22505 (PMC10334220; doi:10.1001/jamanetworkopen.2023.22505), 2023-07-10
Supplement: jamanetwopen-e2322505-s003.pdf [file jamanetwopen-e2322505-s003.pdf]

## Data Sharing Statement

Herrinton. Effectiveness of Bundled Hyperpolypharmacy Deprescribing Compared With Usual Care Among Older Adults. *JAMA Netw Open*. Published July 10, 2023.  
doi:10.1001/jamanetworkopen.2023.22505

### Data

**Data available:** No

### Additional Information

**Explanation for why data not available:** Proprietary information
